# Supplementary figures and images for: Decoupled Patterns of Diversity and Disparity Characterize an Ecologically Specialized Lineage of Neotropical Cricetids
Source: Springer Nature journal article supplement (doi:10.1007/s11692-022-09596-8), 2023-01-19

$f = 0.93$

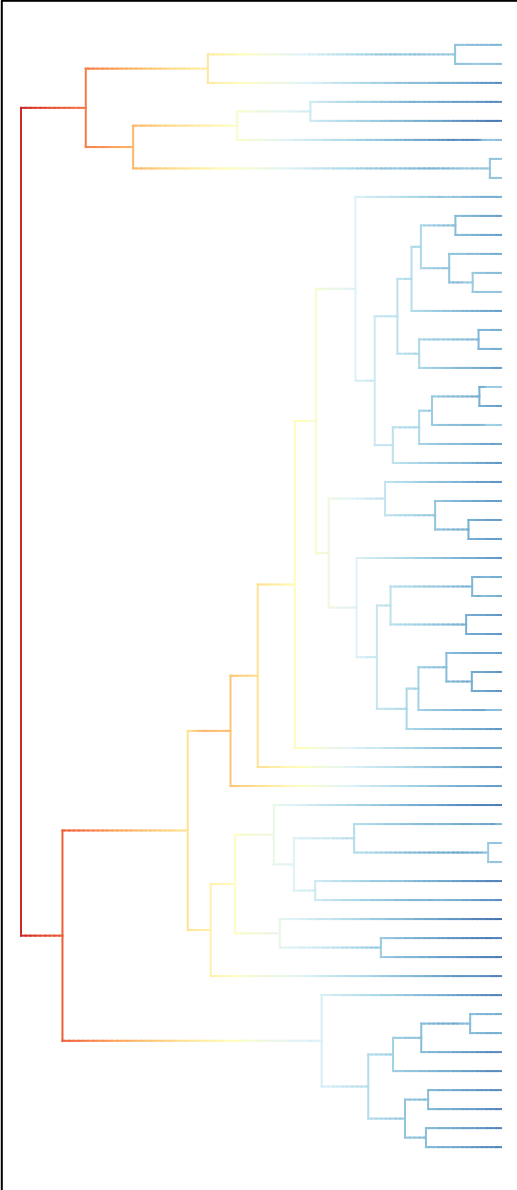

**run1**  
 $f = 0.029$

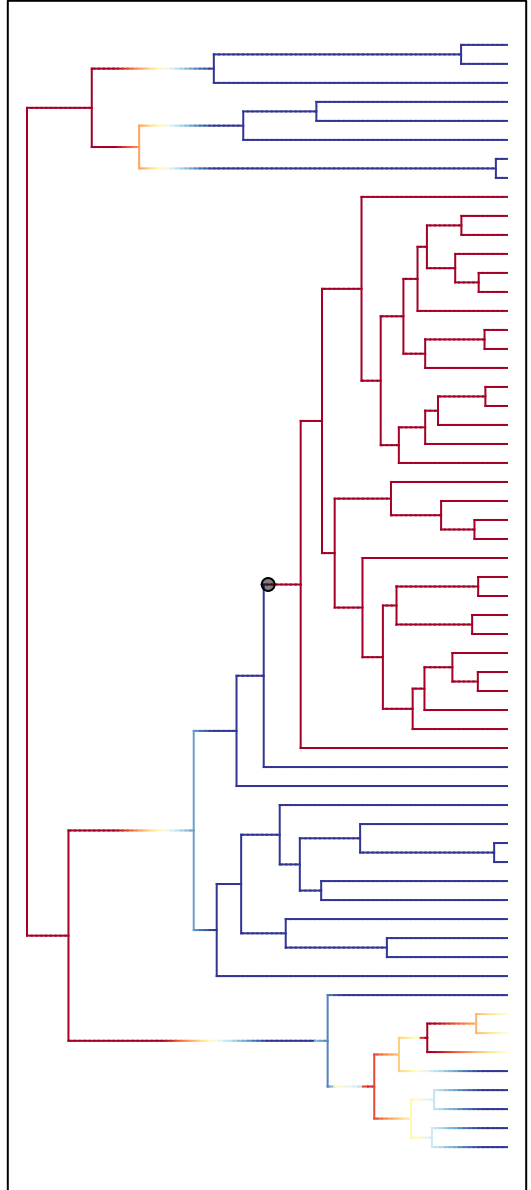

f = 0.94

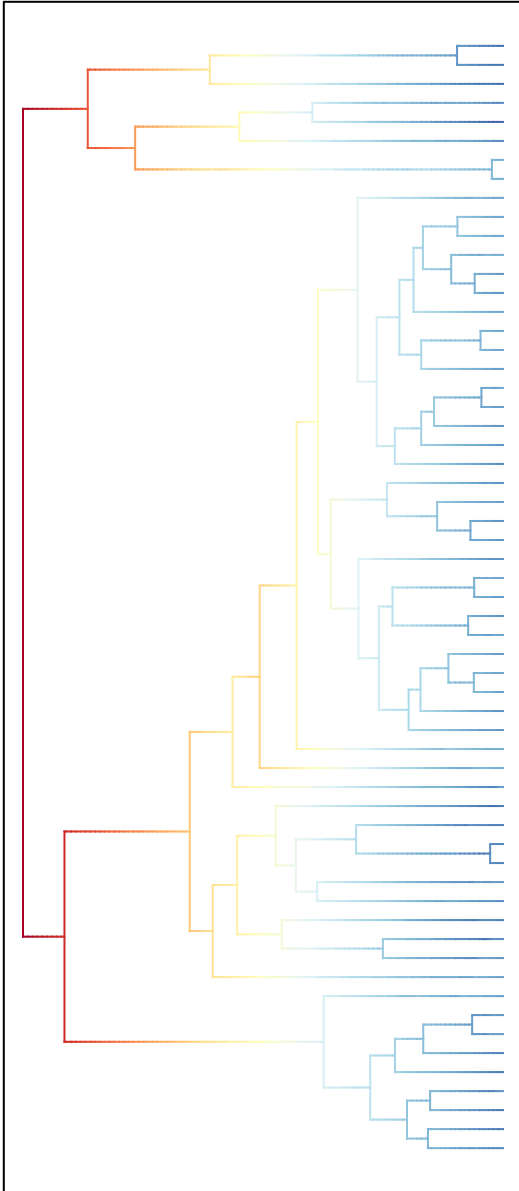

run2  
f = 0.028

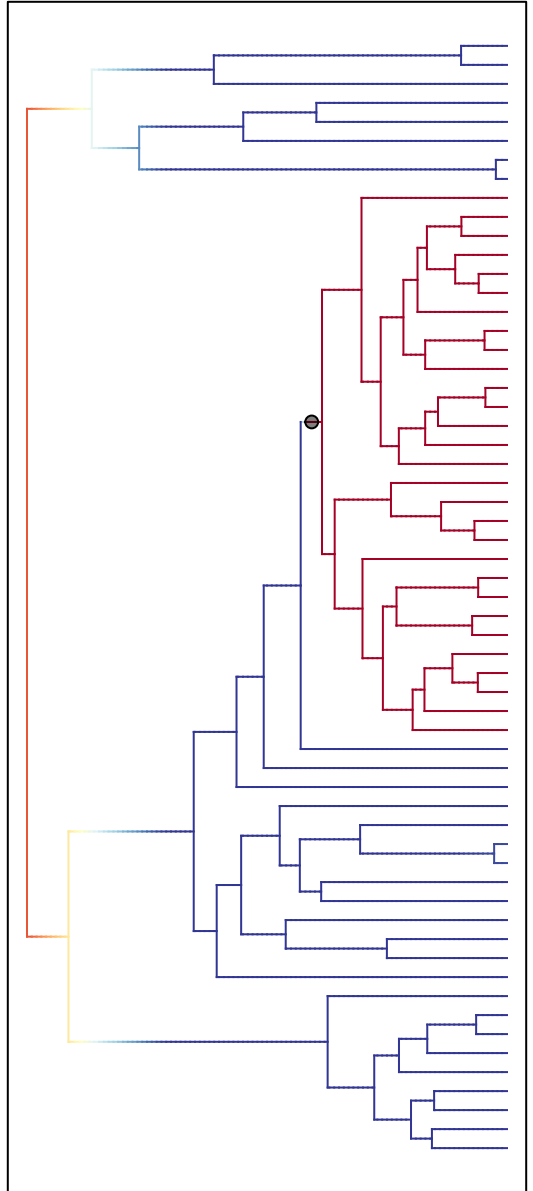

Supplement: 11692_2022_9596_MOESM10_ESM.pdf [file 11692_2022_9596_MOESM10_ESM.pdf]
